# Supplementary material for: Rain drives foraging decisions of an urban exploiter
Source: PLoS One. 2018 Apr 11;13(4):e0194484. doi: 10.1371/journal.pone.0194484 (PMC5894991; doi:10.1371/journal.pone.0194484)
Supplement: S1 File — Rainfall records also included sourced from the Bureau of Meteorology (www.bom.gov.au) (XLSX) [file pone.0194484.s001.xlsx]

## Sheet: Foraging
Date	Weather	Site	Time	Count	Bird	Hits	Worms	Time	Hits/min	Total hits	totalworms	Aveworms	hits/bird	av hits/min						Site	Date	Weather	Count	Density	Total hits	worms	worm %
2015-05-05	wet	Belmore	7:00am	17	1	2		5	0.4											B	2015-05-05	W	17	6.8	18	0
					2	7		10	0.7											B	2015-05-07	D	21	8.4	7	0
					3	1		5	0.2											B	2015-05-15	W	24	9.6	4	0
					4	1		5	0.2											B	2015-05-20	D	18	7.2	1	0
					5	7		5	1.4	18	0		3.6	0.58						B	2015-05-21	D	30	12	4	0
		Hyde	7:45am	19	1	3		5	0.6											B	2015-05-22	W	29	11.6	5	0
					2	3		10	0.3											B	2015-05-27	W	23	9.2	7	0
					3	4		5	0.8											B	2015-05-28	D	15	6	1	0
					4	5		5	1											B	2015-05-29	D	21	8.4	17	0
					5	2		5	0.4	17	0		3.4	0.62						B	2015-06-02	D	40	16	3	0
		Domain	8:30am	29	1	23		5	4.6											B	2015-06-03	D	41	16.4	4	0
					2	15		10	1.5											B	2015-06-05	D	27	10.8	12	0
					3	11		10	1.1											B	2015-06-10	W	17	6.8	14	0
					4	9		5	1.8	58	0		14.5	2.25						B	2015-06-17	W	9	3.6	15	3
		Royal	9:10am	32	1	6		10	0.6											B	2015-06-18	W	14	5.6	7	2
					2	29		10	2.9											B	2015-06-19	W	8	3.2	11	2
					3	17		10	1.7	52	0		17.3333	1.73333						B	2015-08-25	W	20	8	8	3
2015-05-07	dry	Belmore	7:00am	21	1	1		5	0.2											B	2015-08-26	W	20	8	8	3
					2	5		10	0.5											B	2015-08-28	D	34	13.6	5	0
					3	1		10	0.1											B	2015-09-02	D	34	13.6	0	0
					4	0		5	0	7	0		1.75	0.2						H	2015-05-05	W	19	1.1875	17	0
		Hyde	7:20am	5	1	4		10	0.4											H	2015-05-07	D	5	0.3125	18	0
					2	9		10	0.9											H	2015-05-15	W	5	0.3125	17	0
					3	5		10	0.5	18	0		6	0.6						H	2015-05-20	D	10	0.625	16	0
		Domain	7:50am	6	1	14	5	10	1.4											H	2015-05-21	D	21	1.3125	15	2
					2	16	1	10	1.6											H	2015-05-22	W	22	1.375	42	2
					3	5	1	10	0.5	35	7		11.6667	1.16667						H	2015-05-27	W	23	1.4375	9	0
		Royal	8:15am	34	1	22	1	10	2.2											H	2015-05-28	D	10	0.625	18	1
					2	21	1	10	2.1											H	2015-05-29	D	8	0.5	28	2
					3	15	1	10	1.5	58	3		19.3333	1.93333						H	2015-06-02	D	6	0.375	0	0
2015-05-15	wet	Belmore	8:15am	24	1	0		10	0											H	2015-06-03	D	19	1.1875	11	0
					2	3		10	0.3											H	2015-06-05	D	6	0.375	12	0
					3	1		5	0.2											H	2015-06-10	W	16	1	19	3
					4	0		5	0	4	0		1	0.125						H	2015-06-17	W	31	1.9375	33	7
		Hyde	8:40am	5	1	2		10	0.2											H	2015-06-18	W	9	0.5625	21	11
					2	1		5	0.2											H	2015-06-19	W	35	2.1875	26	4
					3	12		10	1.2											H	2015-08-25	W	10	0.625	15	4
					4	2		5	0.4	17	0		4.25	0.5						H	2015-08-26	W	12	0.75	19	6
		Domain	9:30am	14	1	2		5	0.4											H	2015-08-28	D	6	0.375	11	1
					2	15		10	1.5											H	2015-09-02	D	12	0.75	4	1
					3	13	1	10	1.3											D	2015-05-05	W	29	0.966667	58	0
					4	7		5	1.4	37	1		9.25	1.15						D	2015-05-07	D	6	0.2	35	7
		Royal	9:45am	56	1	10	1	10	1											D	2015-05-15	W	14	0.466667	37	1
					2	2		5	0.4											D	2015-05-20	D	28	0.933333	13	0
					3	13	1	10	1.3											D	2015-05-21	D	15	0.5	11	2
					4	5	1	5	1	30	3		7.5	0.925						D	2015-05-22	W	87	2.9	34	4
2015-05-20	dry	Belmore	10:30am	18	1	0		10	0											D	2015-05-27	W	12	0.4	18	0
					2	1		10	0.1											D	2015-05-28	D	29	0.966667	63	0
					3	0		10	0	1	0		0.333333	0.0333333						D	2015-05-29	D	29	0.966667	30	1
		Hyde	8:30am	10	1	0		5	0											D	2015-06-02	D	7	0.233333	27	0
					2	8		10	0.8											D	2015-06-03	D	7	0.233333	9	0
					3	6		10	0.6											D	2015-06-05	D	16	0.533333	15	2
					4	2		5	0.4	16	0		4	0.45		G #41				D	2015-06-10	W	30	1	44	11
		Domain	8:55am	28	1	1		5	0.2											D	2015-06-17	W	37	1.23333	47	9
					2	2		5	0.4											D	2015-06-18	W	11	0.366667	31	7
					3	2		5	0.4											D	2015-06-19	W	70	2.33333	15	1
					4	2		5	0.4											D	2015-08-25	W	9	0.3	19	1
					5	4		5	0.8											D	2015-08-26	W	12	0.4	20	5
					6	2		5	0.4	13	0		2.16667	0.433333						D	2015-08-28	D	9	0.3	16	1
		Royal	9:35am	38	1	4		5	0.8											D	2015-09-02	D	4	0.133333	20	3
					2	9		5	1.8											R	2015-05-05	W	32	1.28	52	0
					3	16		10	1.6											R	2015-05-07	D	34	1.36	58	3
					4	6	1	5	1.2											R	2015-05-15	W	56	2.24	30	3
					5	5	1	5	1	40	2		8	1.28						R	2015-05-20	D	38	1.52	40	2
2015-05-21	dry	Belmore	8:30am	30	1	2		10	0.2											R	2015-05-21	D	42	1.68	40	0
					2	1		10	0.1											R	2015-05-22	W	35	1.4	6	0
					3	1		10	0.1	4	0		1.33333	0.133333						R	2015-05-27	W	43	1.72	40	0
		Hyde	9:00am	21	1	3		10	0.3											R	2015-05-28	D	33	1.32	53	1
					2	9	2	10	0.9											R	2015-05-29	D	37	1.48	28	2
					3	3		10	0.3	15	2		5	0.5						R	2015-06-02	D	25	1	40	0
		Domain	9:35am	15	1	0		5	0											R	2015-06-03	D	40	1.6	25	0
					2	2		5	0.4											R	2015-06-05	D	46	1.84	34	0
					3	1		5	0.2											R	2015-06-10	W	28	1.12	27	6
					4	3		10	0.3											R	2015-06-17	W	8	0.32	43	10
					5	5		5	1	11	0		2.2	0.38		pink/blue m/y				R	2015-06-18	W	17	0.68	27	0
		Royal	10:20am	42	1	17		10	1.7											R	2015-06-19	W	40	1.6	21	2
					2	11		10	1.1											R	2015-08-25	W	34	1.36	13	3
					3	12		10	1.2	40	0		13.3333	1.33333						R	2015-08-26	W	13	0.52	32	2
2015-05-22	wet	Belmore	8:30am	29	1	3		5	0.6											R	2015-08-28	D	26	1.04	51	1
					2	1		5	0.2											R	2015-09-02	D	37	1.48	22	0
					3	1		5	0.2
					4	0		5	0
					5	0		5	0
					6	0		5	0	5	0		0.833333	0.166667
		Hyde	8:50am	22	1	8	1	5	1.6
					2	18		10	1.8
					3	6		5	1.2
					4	10	1	10	1	42	2		10.5	1.4
		Domain	9:30am	15	1	5	1	5	1							m/m m/y
					2	3		5	0.6
					3	16	2	10	1.6
					4	10	1	10	1	34	4		8.5	1.05
		Royal	9:50am	35	1	1		10	0.1
					2	3		10	0.3							Y #11
					3	2		10	0.2	6	0		2	0.2
2015-05-27	wet	Belmore	10:25am	23	1	3		10	0.3
					2	2		10	0.2
					3	2		10	0.2	7	0		2.33333	0.233333
		Hyde	10:00am	23	1	3		10	0.3
					2	6		10	0.6
					3	0		10	0	9	0		3	0.3
		Domain	8:45am	12	1	3		5	0.6
					2	1		5	0.2
					3	5		10	0.5
					4	9		10	0.9	18	0		4.5	0.55
		Royal	9:30am	43	1	10		10	1
					2	22		10	2.2
					3	8		10	0.8	40	0		13.3333	1.33333
2015-05-28	dry	Belmore	8:05am	15	1	1		5	0.2
					2	0		10	0
					3	0		10	0
					4	0		5	0	1	0		0.25	0.05
		Hyde	8:25am	10	1	12	1	10	1.2
					2	3		5	0.6
					3	3		5	0.6
					4	0		10	0	18	1		4.5	0.6
		Domain	9:00am	29	1	11		10	1.1
					2	11		10	1.1
					3	41		10	4.1	63	0		21	2.1
		Royal	9:35am	33	1	3		10	0.3							Y #113
					2	3		5	0.6
					3	40	1	10	4
					4	7		5	1.4	53	1		13.25	1.575
2015-05-29	wet	Belmore	8:00am	21	1	5		10	0.5							Y #42		Cockatoos #51, 78
					2	9		10	0.9
					3	3		10	0.3	17	0		5.66667	0.566667
		Hyde	8:20am	8	1	9	1	10	0.9							white/blue m/g
					2	9		10	0.9
					3	5		5	1
					4	5	1	5	1	28	2		7	0.95
		Domain	9:00am	29	1	1		5	0.2
					2	6		5	1.2
					3	6		5	1.2
					4	1		5	0.2
					5	9	1	5	1.8
					6	7		5	1.4	30	1		5	1
		Royal	9:25am	37	1	14	1	10	1.4							m/m m/y ??
					2	1		5	0.2							Y #81, 64, 17		Cockatoos #78
					3	2	1	5	0.4
					4	2		5	0.4
					5	9		5	1.8	28	2		5.6	0.84
2015-06-02	dry	Belmore	9:35am	40	1	2		5	0.4
					2	1		5	0.2
					3	0		5	0
					4	0		5	0
					5	0		5	0
					6	0		5	0	3	0		0.5	0.1
		Hyde	10:30am	6	1	0		10	0
					2	0		10	0
					3	0		10	0	0	0		0	0
		Domain	8:45am	7	1	15		10	1.5
					2	7		10	0.7
					3	5		10	0.5	27	0		9	0.9
		Royal	8:15am	25	1	15		10	1.5
					2	14		10	1.4							Y #13
					3	11		10	1.1	40	0		13.3333	1.33333
2015-06-03	dry	Belmore	10:30am	41	1	2		10	0.2
					2	2		10	0.2
					3	0		5	0							pink/b m/y
					4	0		5	0	4	0		1	0.1
		Hyde	9:55am	19	1	4		10	0.4
					2	5		10	0.5
					3	2		10	0.2	11	0		3.66667	0.366667
		Domain	9:35am	7	1	1		10	0.1
					2	6		10	0.6
					3	2		10	0.2	9	0		3	0.3
		Royal	9:10am	40	1	13		10	1.3
					2	7		10	0.7
					3	5		10	0.5	25	0		8.33333	0.833333
2015-06-04	dry	Belmore	10:00am	25	1	0		10	0
					2	0		10	0
					3	0		10	0
		Hyde	9:40am	18	1	0		10	0
					2	0		10	0
					3	1		10	0.1							Mutant
		Domain	no birds due to colour run, not sure what to do						#DIV/0!
		Royal	9:10am	29	1	1		5	0.2
					2	4		5	0.8
					3	4		5	0.8							black/pink m/y
					4	2		5	0.4							pink/? y/m
					5	4		5	0.8							Black/orange m/y
					6	3		5	0.6
2015-06-05	dry	Belmore	7:45am	27	1	6		10	0.6
					2	3		10	0.3							Y #90, 46
					3	3		10	0.3	12	0		4	0.4
		Hyde	8:15am	6	1	2		10	0.2
					2	7		10	0.7
					3	3		5	0.6
					4	0		5	0	12	0		3	0.375
		Domain	8:35am	16	1	3		10	0.3
					2	2		5	0.4
					3	3	1	5	0.6
					4	4	1	5	0.8
					5	3		5	0.6	15	2		3	0.54
		Royal	9:00am	46	1	13		10	1.3							Y #43, 33
					2	2		5	0.4
					3	1		5	0.2
					4	18		10	1.8	34	0		8.5	0.925
2015-06-10	wet	Belmore	8:15am	17	1	4		10	0.4
					2	7		10	0.7
					3	3		10	0.3	14	0		4.66667	0.466667
		Hyde	8:35am	16	1	1		5	0.2
					2	8	2	10	0.8
					3	3		5	0.6
					4	3		5	0.6
					5	4	1	5	0.8	19	3		3.8	0.6		Blue/green m/y
		Domain	9:10am	30	1	10	5	10	1
					2	10	2	10	1
					3	24	4	10	2.4	44	11		14.6667	1.46667
		Royal	9:35am	28	1	14	3	10	1.4
					2	9	3	10	0.9
					3	4		10	0.4	27	6		9	0.9
2015-06-17	wet	Belmore	8:15am	9	1	3	1	10	0.3							White/yellow m/y
					2	6	1	10	0.6							Y #39, 72, 81
					3	6	1	10	0.6	15	3		5	0.5		org/purp m/y
		Hyde	8:45am	31	1	10	3	10	1
					2	7	1	5	1.4
					3	12	3	10	1.2
					4	4		5	0.8	33	7		8.25	1.1
		Domain	9:20am	37	1	14	3	10	1.4							Y #41
					2	19	3	10	1.9
					3	14	3	10	1.4	47	9		15.6667	1.56667
		Royal	9:50am	8	1	11		10	1.1							purple/yellow y/m
					2	6		10	0.6
					3	26	10	10	2.6	43	10		14.3333	1.43333		Y #91
2015-06-18	wet	Belmore	8:00am	14	1	4	2	10	0.4
					2	3		10	0.3
					3	0		5	0
					4	0		5	0	7	2		1.75	0.175
		Hyde	8:20am	9	1	10	5	10	1
					2	2	2	10	0.2
					3	5	2	5	1
					4	4	2	5	0.8	21	11		5.25	0.75
		Domain	8:50am	11	1	14	5	10	1.4							Y #28.41
					2	8	1	10	0.8							blue/red g/m
					3	5		5	1
					4	4	1	5	0.8	31	7		7.75	1
		Royal	9:30am	17	1	10		10	1
					2	6		10	0.6
					3	11		10	1.1	27	0		9	0.9
2015-06-19	wet	Belmore	7:50am	8	1	5	2	10	0.5
					2	2		10	0.2
					3	4		10	0.4	11	2		3.66667	0.366667
		Hyde	8:20am	35	1	7	2	10	0.7
					2	12		10	1.2
					3	7	2	10	0.7	26	4		8.66667	0.866667
		Domain	8:40am	70	1	5	1	10	0.5
					2	6		10	0.6							purp/yell y/m
					3	4		10	0.4	15	1		5	0.5		pink/white y/m
		Royal	9:00am	40	1	7		10	0.7
					2	6		10	0.6
					3	8	2	10	0.8	21	2		7	0.7		?/? m/y
2015-08-25	W	B		20	1	3		5	0.6
					2	0		5	0
					3	2	1	10	0.2
					4	3	2	10	0.3	8	3		2	0.275		Y #81, 17
		H		12	1	8	2	10	0.8
					2	3	1	10	0.3
					3	4	1	10	0.4	15	4		5	0.5
		D		9	1	1		5	0.2
					2	1		5	0.2
					3	10	1	10	1							prup/org m/y
					4	7		10	0.7	19	1		4.75	0.525
		R		34	1	4		10	0.4
					2	4	1	10	0.4							black/y y/m
					3	5	2	10	0.5	13	3		4.33333	0.433333
2015-08-26	W	B		20	1	3		5	0.6
					2	0		5	0							Y #33,79,83,90
					3	2	2	10	0.2							?/org g/m
					4	3	1	10	0.3	8	3		2	0.275		?green/? y/m
		H		12	1	9	2	10	0.9
					2	5	1	10	0.5
					3	5	3	10	0.5	19	6		6.33333	0.633333
		D		12	1	3	1	10	0.3
					2	10	2	10	1
					3	7	2	10	0.7	20	5		6.66667	0.666667
		R		13	1	22		10	2.2
					2	5	2	10	0.5
					3	5		10	0.5	32	2		10.6667	1.06667
2015-08-28	D	B		34	1	2		10	0.2
					2	2		10	0.2
					3	1		10	0.1	5	0		1.66667	0.166667
		H		6	1	3		10	0.3
					2	5	1	10	0.5
					3	3		10	0.3	11	1		3.66667	0.366667
		D		9	1	6		10	0.6
					2	6	1	10	0.6
					3	4		10	0.4	16	1		5.33333	0.533333
		R		26	1	19	1	10	1.9
					2	22		10	2.2
					3	10		10	1	51	1		17	1.7
2015-09-02	D	B		34	1	0		10	0
					2	0		10	0
					3	0		10	0	0	0		0	0
		H		12	1	2	1	10	0.2
					2	1		10	0.1
					3	1		10	0.1	4	1		1.33333	0.133333
		D		4	1	15	3	10	1.5
					2	5		10	0.5
					3	0		10	0	20	3		6.66667	0.666667
		R		37	1	6		10	0.6
					2	13		10	1.3
					3	3		10	0.3	22	0		7.33333	0.733333

## Sheet: Sites
Site	Size (ha)	%Tree Cover	bird density	human density	Nesting	Bins	Café	Tents	Anthropogenic Food	Dumpers					Lunchers				School Children				Total				Ave
Belmore	2.5				N	16	0	27		Y				15	5	7	10		0	0	0		5	7	10	0	5.5	4.32049
Hyde	16.2				Y	62	1	0		N				2	121	69	110		70	0	50		191	69	160	0	105	43.5936
Domain	34				N	13	1	0		N				0	18	12	48		60	0	20		78	12	68	0	39.5	22.8532
Royal	30				Y	70	1	0		N				0	75	40	26		70	80	110		145	120	136	0	100.25	30.0028
Site	Bins	Dumpers	Lunchers	sd	se	Café
Belmore	6.4	15	2.2	1.7282	0.705534	0
Hyde	3.82716	2	6.48148	2.69096	1.09858	2
Domain	0.382353	0	1.16176	0.672152	0.274405	2
Royal	2.33333	0	3.34167	1.00009	0.408286	1

## Sheet: newcount
Site	Dry Count	Wet Count	Dry Density	Wet Density					Hits Dry	Hits Wet	Cons. Dry	Cons. Wet					Worm Dry	Worm Wet								no. worm dry		%worm dry			Count
Belmore	21	17	8.4	6.8					7	18	0.233333	0.6					0	0	0	0						0	0	0	0		Site	Dry	Wet	Sd		se			Before		Break		After
Belmore	18	24	7.2	9.6					1	4	0.0333333	0.133333					0	0	0	0						0	0	0	0		Belmore	11.24	7.24	3.66824	2.62941	1.16	0.831491		2	2	50	50	4.24	0.24
Belmore	30	29	12	11.6					4	5	0.133333	0.166667					0	0	0	0						0	0	0	0		Hyde	0.64375	1.1375	0.349913	0.608676	0.110652	0.19248		0.64375	1.1375	#N/A	#N/A	#N/A	#N/A
Belmore	15	23	6	9.2					7	1	0.233333	0.0333333					0	0	0	0						0	0	0	0		Domain	0.5	1.03667	0.338479	0.902185	0.107036	0.285296		0.5	1.03667	#N/A	#N/A	#N/A	#N/A
Belmore	21	17	8.4	6.8					17	14	0.566667	0.466667					0	0	0	0						0	0	0	0		Garden	1.432	1.224	0.263852	0.586121	0.0834373	0.185348		1.432	1.224	#N/A	#N/A	#N/A	#N/A
Belmore	40	9	16	3.6					3	15	0.1	0.5					0	3	0	0.1						0	20	0	20
Belmore	41	14	16.4	5.6					4	7	0.133333	0.233333					0	2	0	0.0666667						0	28.5714	0	28.5714		Consumption Rates
Belmore	27	8	10.8	3.2					12	11	0.4	0.366667					0	2	0	0.0666667						0	18.1818	0	18.1818		Site	Dry	Wet	Sd		se
Belmore	34	20	13.6	8					5	8	0.166667	0.266667					0	3	0	0.1						0	37.5	0	37.5		Belmore	0.2	0.303333	0.171414	0.17809	0.0542058	0.056317
Belmore	34	20	13.6	8	11.24	7.24	3.66824	2.62941	0	8	0	0.266667	0.2	0.303333	0.171414	0.17809	0	3	0	0.1	0	0.0433333	0	0.0472712		0	37.5	0	37.5		Hyde	0.443333	0.726667	0.259653	0.318871	0.0821095	0.100836
Hyde	5	19	0.3125	1.1875					18	17	0.6	0.566667					0	0	0	0						0	0	0	0		Domain	0.796667	1.07667	0.540107	0.480753	0.170797	0.152027
Hyde	10	5	0.625	0.3125					16	17	0.533333	0.566667					0	0	0	0						0	0	0	0		Garden	1.30333	0.97	0.405959	0.459858	0.128375	0.14542
Hyde	21	22	1.3125	1.375					15	42	0.5	1.4					2	2	0.0666667	0.0666667						13.3333	4.7619	13.3333	4.7619
Hyde	10	23	0.625	1.4375					18	9	0.6	0.3					1	0	0.0333333	0						5.55556	0	5.55556	0		Worms/min
Hyde	8	16	0.5	1					28	19	0.933333	0.633333					2	3	0.0666667	0.1						7.14286	15.7895	7.14286	15.7895		Site	Dry	Wet	Sd		se
Hyde	6	31	0.375	1.9375					0	33	0	1.1					0	7	0	0.233333						0	21.2121	0	21.2121		Belmore	0	0.0433333	0	0.0472712	0	0.0149485
Hyde	19	9	1.1875	0.5625					11	21	0.366667	0.7					0	11	0	0.366667						0	52.381	0	52.381		Hyde	0.0233333	0.123333	0.0274424	0.118686	0.00867806	0.0375319
Hyde	6	35	0.375	2.1875					12	26	0.4	0.866667					0	4	0	0.133333						0	15.3846	0	15.3846		Domain	0.0533333	0.13	0.0723503	0.132823	0.0228792	0.0420024
Hyde	12	10	0.75	0.625					11	15	0.366667	0.5					1	4	0.0333333	0.133333						9.09091	26.6667	9.09091	26.6667		RBG	0.03	0.0866667	0.0366835	0.107955	0.0116003	0.0341384
Hyde	6	12	0.375	0.75	0.64375	1.1375	0.349913	0.608676	4	19	0.133333	0.633333	0.443333	0.726667	0.259653	0.318871	1	6	0.0333333	0.2	0.0233333	0.123333	0.0274424	0.118686		25	31.5789	25	31.5789
Domain	6	29	0.2	0.966667					35	58	1.16667	1.93333					7	0	0.233333	0						20	0	20	0
Domain	28	14	0.933333	0.466667					13	37	0.433333	1.23333					0	1	0	0.0333333						0	2.7027	0	2.7027
Domain	15	87	0.5	2.9					11	34	0.366667	1.13333					2	4	0.0666667	0.133333						18.1818	11.7647	18.1818	11.7647
Domain	29	12	0.966667	0.4					63	18	2.1	0.6					0	0	0	0						0	0	0	0		Scale break			Before	Break	After
Domain	29	30	0.966667	1					30	44	1	1.46667					1	11	0.0333333	0.366667						3.33333	25	3.33333	25		Max	12
Domain	7	37	0.233333	1.23333					27	47	0.9	1.56667					0	9	0	0.3						0	19.1489	0	19.1489		Resume	7
Domain	7	11	0.233333	0.366667					9	31	0.3	1.03333					0	7	0	0.233333						0	22.5806	0	22.5806		Break	2
Domain	16	70	0.533333	2.33333					15	15	0.5	0.5					2	1	0.0666667	0.0333333						13.3333	6.66667	13.3333	6.66667		Min	0
Domain	9	9	0.3	0.3					16	19	0.533333	0.633333					1	1	0.0333333	0.0333333						6.25	5.26316	6.25	5.26316
Domain	4	12	0.133333	0.4	0.5	1.03667	0.338479	0.902185	20	20	0.666667	0.666667	0.796667	1.07667	0.540107	0.480753	3	5	0.1	0.166667	0.0533333	0.13	0.0723503	0.132823		15	25	15	25
RBG	34	32	1.36	1.28					58	52	1.93333	1.73333					3	0	0.1	0						5.17241	0	5.17241	0		Worms/min
RBG	38	56	1.52	2.24					40	30	1.33333	1					2	3	0.0666667	0.1						5	10	5	10		Site	Dry	Wet	Sd		se
RBG	42	35	1.68	1.4					40	6	1.33333	0.2					0	0	0	0						0	0	0	0		Belmore	0	14.2857	0	26.5434	0	8.39377
RBG	33	43	1.32	1.72					53	40	1.76667	1.33333					1	0	0.0333333	0						1.88679	0	1.88679	0		Hyde	5.26316	16.9725	10.5689	37.2207	3.34217	11.7702
RBG	37	28	1.48	1.12					28	27	0.933333	0.9					2	6	0.0666667	0.2						7.14286	22.2222	7.14286	22.2222		Domain	6.69456	12.0743	13.3955	27.6281	4.23604	8.73678
RBG	25	8	1	0.32					40	43	1.33333	1.43333					0	10	0	0.333333						0	23.2558	0	23.2558		RBG	2.30179	8.93471	9.03626	23.4758	2.85752	7.42369
RBG	40	17	1.6	0.68					25	27	0.833333	0.9					0	0	0	0						0	0	0	0
RBG	46	40	1.84	1.6					34	21	1.13333	0.7					0	2	0	0.0666667						0	9.52381	0	9.52381
RBG	26	34	1.04	1.36					51	13	1.7	0.433333					1	3	0.0333333	0.1						1.96078	23.0769	1.96078	23.0769
RBG	37	13	1.48	0.52	1.432	1.224	0.263852	0.586121	22	32	0.733333	1.06667	1.30333	0.97	0.405959	0.459858	0	2	0	0.0666667	0.03	0.0866667	0.0366835	0.107955		0	6.25	0	6.25
																					Dry weather	Wet weather				3.9346	13.0496	3.9346	13.0496
																					0.0266667	0.0958333	0.0454167	0.108391				6.4882	13.4925	0.00718101	0.0171381
				the percentage of worms which made up ibis consumption rates																		se	0.00718101	0.0171381
				Dry	Wet
				3.9346	13.0496
				1.02587	2.13335
																					TUKEYES TEST

## Sheet: rain
RBG														RBG	OH	AVE
1st	0	0	0	4.6	27.6	0							2015-05-01	27.6	28.4	28
2nd	0	3.8	15.4	0.1	9	0							2015-05-02	9	8.6	8.8
3rd	0	1.4	0	0.2	23	0							2015-05-03	23	31.6	27.3
4th	0	1.6	0	26	0.6	0							2015-05-04	0.6	0.4	0.5
5th	0	8.8	0	21.6	0	0							2015-05-05	0	0	0
6th	0	0.4	0	0	0	1.8							2015-05-06	0	0.2	0.1
7th	0	0	1.6	0.6	0	0							2015-05-07	0	0	0
8th	0	0	0	2.6	0	0							2015-05-08	0	0	0
9th	0	0	0	0	0	0							2015-05-09	0	0	0
10th	0	0.8	0	0.8	0	1.8							2015-05-10	0	0	0
11th	22	0	0	6.6	0	7.6							2015-05-11	0	0	0
12th	8	0	0.4	0	0	0.4							2015-05-12	0	0	0
13th	4.8	4.8	2.4	0	0	0							2015-05-13	0	0	0
14th	0.2	4.8	3	0	3.8	0							2015-05-14	3.8	2.2	3
15th	0	0.8	0	0	0	0							2015-05-15	0	0.2	0.1
16th	0	0	7.6	0.8	2	4							2015-05-16	2	0.8	1.4
17th	0	0	0	2	0.8	11.4							2015-05-17	0.8	0.6	0.7
18th	0	0	0	1	0.2	2.4							2015-05-18	0.2	0	0.1
19th	0.2	0.4	1	2.8	0.6	75.6							2015-05-19	0.6	0.2	0.4
20th	8.6	0	0	17	1	7.5							2015-05-20	1	0.4	0.7
21st	24.8	2.5	22	126.4	0.2	0.2							2015-05-21	0.2	0.2	0.2
22nd	0.4	2	0.2	118	11.2	4.4							2015-05-22	11.2	11.2	11.2
23rd	0	0.6	0.8	29.2	22								2015-05-23	22	24.4	23.2
24th	0	0.6		0	0.1								2015-05-24	0.1	0.2	0.15
25th	1.2	6.4	27	0	0								2015-05-25	0	0	0
26th	0	3	0.1	30.4	0								2015-05-26	0	0	0
27th	38	15	0	5.2	0								2015-05-27	0	0	0
28th	75	0	0	0	0								2015-05-28	0	0	0
29th	17.4		0	0	0.4								2015-05-29	0.4	0	0.2
30th	0		0	10.2	0								2015-05-30	0	0.2	0.1
31st	0		23		0								2015-05-31	0	0	0
													2015-06-01	0	0	0
OH													2015-06-02	0	0.2	0.1
1st	0	0	0	6	28.4	0							2015-06-03	0	0	0
2nd	0	3.4	11.4	0	8.6	0.2							2015-06-04	0	0	0
3rd	0	1	0.2	0.6	31.6	0							2015-06-05	0	0	0
4th	0	1.2	0	24	0.4	0							2015-06-06	1.8	1	1.4
5th	0.2	7.4	0	21.4	0	0							2015-06-07	0	0	0
6th	0.2	0.2	0	0	0.2	1							2015-06-08	0	0	0
7th	0	0	0	0.4	0	0							2015-06-09	0	0	0
8th	0	0	0	5.8	0	0							2015-06-10	1.8	2	1.9
9th	0	0	0	0.2	0	0							2015-06-11	7.6	6.6	7.1
10th	0	0	0	0.4	0	2							2015-06-12	0.4	0.4	0.4
11th	21	0.2	0	7.8	0	6.6							2015-06-13	0	0	0
12th	9.6	0	0.2	0.2	0	0.4							2015-06-14	0	0	0
13th	4.8	6.8	0.6	0	0	0							2015-06-15	0	0.2	0.1
14th	0	4.4	1.2	0	2.2	0							2015-06-16	4	2.6	3.3
15th	0	0.6	0	0	0.2	0.2							2015-06-17	11.4	10.8	11.1
16th	0	0	8.8	0.6	0.8	2.6							2015-06-18	2.4	2.2	2.3
17th	0	0	0	1.6	0.6	10.8							2015-06-19	75.6	67	71.3
18th	0	0	0	0.4	0	2.2							2015-06-20	7.5	7.2	7.35
19th	0	0.2	0.2	2.4	0.2	67							2015-06-21	0.2	1.2	0.7
20th	6.2	0	0	13.2	0.4	7.2							2015-06-22	4.4	3	3.7
21st	18	1	2	119.4	0.2	1.2									0
22nd	0.2	1.2	2.2	105.8	11.2	3
23rd	0	0	1.4	29	24.4	0
24th	0	0.2	0.2	0	0.2
25th	1	0	22.4	0.2	0
26th	0.6	4.2	0.2	13	0
27th	33	26.8	0	4	0
28th	57	0.2	0	0.2	0
29th	14		0	0	0
30th	0		0	10.2	0.2
31st	0		14.2		0

## Sheet: Worms
Site	Date	Weather	Quadrat 1	Quadrat 2	Quadrat 3	Total					Average Worms
B	2015-08-19	D	0	0	0	0					Site	Dry	Wet	sd		se
	2015-08-25	W	2	9	0	3.66667					Belmore	0.777778	3.5	0.83887	0.166667	0.484322	0.096225
	2015-08-26	W	1	7	2	3.33333					Hyde	3.33333	7.66667	2.18581	0.666667	1.26198	0.3849
		W	1.5	8	1	3.5					Domain	9.88889	14.5	4.7881	1.5	2.76441	0.866025
	2015-08-28	D	3	1	1	1.66667					RBG	4.88889	7.83333	3.20301	1.5	1.84926	0.866025
	2015-09-01	D	0	1	1	0.666667
H	2015-08-19	D	0	1	10	3.66667					Site
	2015-08-25	W	13	7	1	7					Belmore	2.13889	1.58611	0.647526
	2015-08-26	W	6	13	6	8.33333					Hyde	5.5	2.77889	1.13448
		W	9.5	10	3.5	7.66667					Domain	12.1944	4.05575	1.65575
	2015-08-28	D	1	15	0	5.33333					RBG	6.36111	2.75765	1.12581
	2015-09-01	D	3	0	0	1
D	2015-08-19	D	12	30	4	15.3333						Dry	Wet
	2015-08-25	W	10	13	16	13						4.72222	8.375	4.36893	4.22303	1.2612	1.21908
	2015-08-26	W	19	20	9	16
		W	14.5	16.5	12.5	14.5
	2015-08-28	D	2	10	7	6.33333
	2015-09-01	D	3	16	5	8
R	2015-08-19	D	8	4	1	4.33333
	2015-08-25	W	13	12	3	9.33333
	2015-08-26	W	5	5	9	6.33333
		W	9	8.5	6	7.83333
	2015-08-28	D	10	9	6	8.33333
	2015-09-01	D	0	0	6	2
